# Supplementary material for: Orally Delivered Scorpion Antimicrobial Peptides Exhibit Activity against Pea Aphid (Acyrthosiphon pisum) and Its Bacterial Symbionts
Source: PubMed Central journal article supplement (PMC5618194; doi:10.3390/toxins9090261), 2017-08-24
Supplement: toxins-09-00261-s001.pdf [file toxins-09-00261-s001.pdf]

# Supplementary Materials: Orally Delivered Scorpion Antimicrobial Peptides Exhibit Activity against Pea Aphid (*Acyrtosiphon pisum*) and Its Bacterial Symbionts

Karen Luna-Ramirez, Marisa Skaljic, Jens Grotmann, Phillipp Kirfel and Andreas Vilcinskas

**Table S1.** Statistical data for Kaplan-Meier analysis shown in Figure 1.

| Treatment                 | Mean <sup>a</sup> |                |                         |             |
|---------------------------|-------------------|----------------|-------------------------|-------------|
|                           | Estimate          | Standard error | 95% Confidence Interval |             |
|                           |                   |                | Lower Bound             | Upper Bound |
| Control                   | 2.880             | 0.054          | 2.774                   | 2.986       |
| Imidacloprid<br>(5 µg/mL) | 1.960             | 0.070          | 1.823                   | 2.097       |
| Rifampicin<br>(50 µg/mL)  | 2.925             | 0.042          | 2.843                   | 3.007       |
| Cecropin A<br>(500 µg/mL) | 2.925             | 0.046          | 2.836                   | 3.014       |
| Apidaecin<br>(500 µg/mL)  | 2.967             | 0.037          | 2.895                   | 3.038       |
| Stomoxyn<br>(500 µg/mL)   | 2.904             | 0.043          | 2.820                   | 2.987       |
| UyCT5<br>(500 µg/mL)      | 2.180             | 0.084          | 2.015                   | 2.345       |
| UyCT1<br>(500 µg/mL)      | 2.653             | 0.086          | 2.485                   | 2.821       |
| UyCT3<br>(500 µg/mL)      | 2.125             | 0.136          | 1.859                   | 2.391       |
| Um4<br>(500 µg/mL)        | 2.475             | 0.131          | 2.218                   | 2.732       |
| Uy17<br>(500 µg/mL)       | 2.525             | 0.080          | 2.368                   | 2.682       |
| Uy192<br>(500 µg/mL)      | 2.380             | 0.069          | 2.244                   | 2.516       |
| Uy234<br>(500 µg/mL)      | 2.600             | 0.081          | 2.441                   | 2.759       |
| D3<br>(500 µg/mL)         | 2.525             | 0.108          | 2.313                   | 2.737       |
| D5<br>(500 µg/mL)         | 2.680             | 0.073          | 2.537                   | 2.823       |
| D10<br>(500 µg/mL)        | 1.979             | 0.094          | 1.795                   | 2.162       |
| D11<br>(500 µg/mL)        | 2.720             | 0.077          | 2.569                   | 2.871       |

a. Estimation is limited to the largest survival time if it is censored.

**Table S2.** List of primers and probes.

| Method used | Target gene                | Primer/probe name        | Primer/probe sequence (5'→3')                     | Annealing temp (°C)/ Product size (bp)<br>E /R <sup>2</sup> (when applicable) | Reference                   |
|-------------|----------------------------|--------------------------|---------------------------------------------------|-------------------------------------------------------------------------------|-----------------------------|
| PCR         | <i>Buchnera</i> (16S rRNA) | Buch16S1F<br>Buch16S1R   | GAGCTTGCTCTCTTTGTCGGCAA<br>CTTCTGCGGGTAACGTCACGAA | 66/430                                                                        | Tsuchida et al., 2002 [1]   |
|             | <i>Serratia</i> (16S rRNA) | 16SA1<br>PASScmp         | AGAGTTTGATCMTGGCTCAG<br>GCAATGTCTTATTAACACAT      | 59/480                                                                        | Fukatsu & Nikoh, 1998 [2]   |
| qPCR        | Ribosomal protein L32      | rpl32_F<br>rpl32_R       | AGTATCGCCCAACAATTATCA<br>CTTGAATCGTCTTCGGACT      | 60/131<br>E=107.19% R <sup>2</sup> =<br>0.998                                 | Sapountzis et al., 2014 [3] |
|             | <i>Buchnera</i> (16S rRNA) | Buchq1F<br>Buchq1R       | AGCGTGGGGAGCAAACAGGA<br>ACATGCTCCACCGCTTGTGC      | 60/185<br>E=94.15%<br>R <sup>2</sup> =0.998                                   | This study                  |
|             | <i>Serratia</i> (16S rRNA) | Serq1_146F<br>Serq1_269R | AGCGTGGGGAGCAAACAGGA<br>ACTCCCCAGGCGGTTCGATTT     | 60/123<br>E=93.14%<br>R <sup>2</sup> =0.999                                   | This study                  |
| FISH        | <i>Buchnera</i> (16S rRNA) | ApisP2a -<br>cy5         | CCTCTTTGGGTAGATCC                                 |                                                                               | Koga et al., 2003 [4]       |
|             | <i>Serratia</i> (16S rRNA) | SerratiaPA<br>-cy3       | GACATCGTTTACAGCGTGGA                              |                                                                               | This study                  |

E= quantitative PCR efficiency, R<sup>2</sup>= coefficient of determination

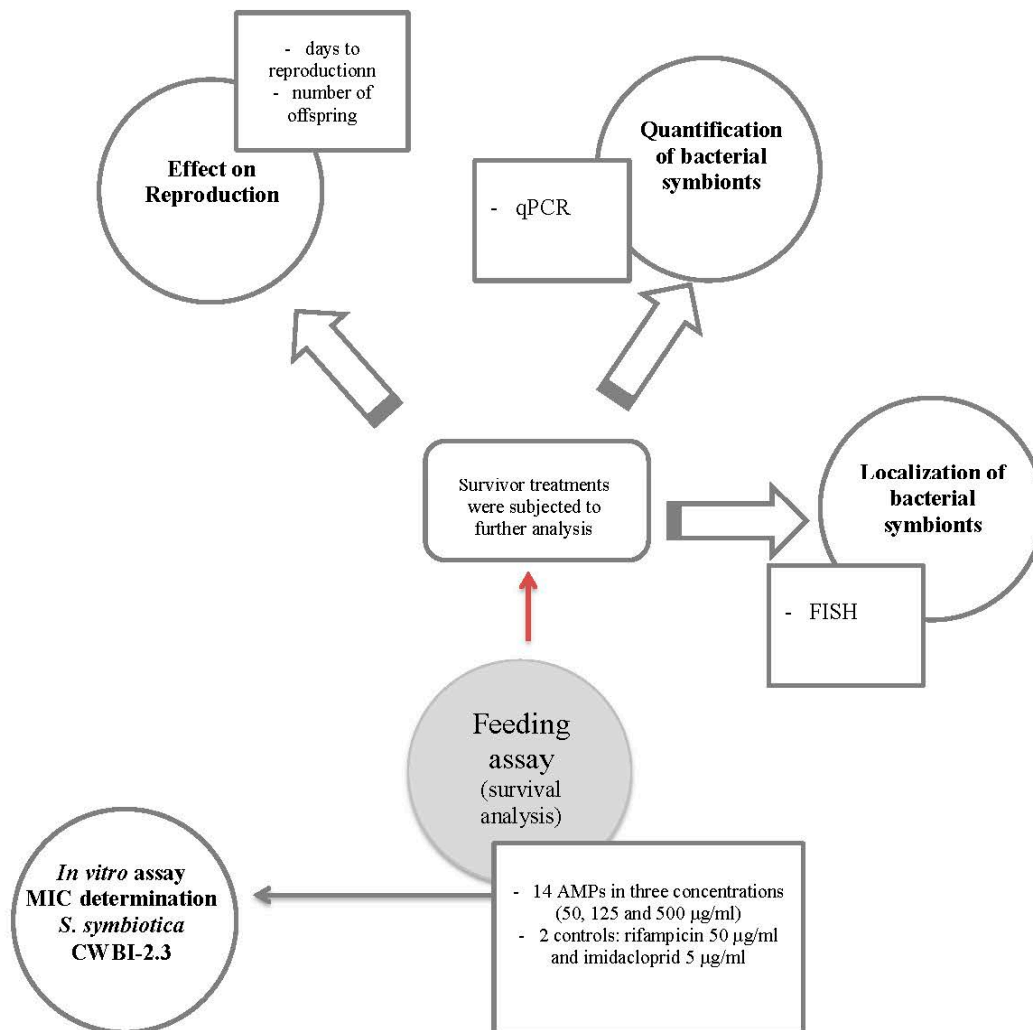

Figure S1. Scheme representing the methodology followed.

## References

1. Tsuchida, T.; Koga, R.; Shibao, H.; Matsumoto, T.; Fukatsu, T. Diversity and geographic distribution of secondary endosymbiotic bacteria in natural populations of the pea aphid, *Acyrtosiphon pisum*. *Mol. Ecol.* **2002**, *11*, 2123–2135.
2. Fukatsu, T.; Nikoh, N. Two intracellular symbiotic bacteria from the mulberry psyllid *Anomoneura mori* (Insecta, Homoptera). *Appl. Environ. Microbiol.* **1998**, *64*, 3599–3606.
3. Sapountzis, P.; Dupont, G.; Balmand, S.; Gaget, K.; Jaubert-Possamai, S.; Febvay, G.; Charles, H.; Rahbe, Y.; Colella, S.; Calevro, F. New insight into the RNA interference response against cathepsin-L gene in the pea aphid, *Acyrtosiphon pisum*: Molting or gut phenotypes specifically induced by injection or feeding treatments. *Insect Biochem. Mol. Biol.* **2014**, *51*, 20–32.
4. Koga, R.; Tsuchida, T.; Fukatsu, T. Changing partners in an obligate symbiosis: A facultative endosymbiont can compensate for loss of the essential endosymbiont *Buchnera* in an aphid. *Proc. Biol. Sci.* **2003**, *270*, 2543–2550.
